# Supplementary material for: Clonally related, Notch-differentiated spinal neurons integrate into distinct circuits
Source: eLife. 2022 Dec 29;11:e83680. doi: 10.7554/eLife.83680 (PMC9799969; doi:10.7554/eLife.83680)
Supplement: Figure 1—source data 1. [file elife-83680-fig1-data1.xlsx]

## Sheet: Fig 1E
Chx10+ (0/2)	23	0.25
Chx10+ (1/2)	61	0.663043
Chx10+ (2/2)	8	0.0869565
Gata3+ (0/2)	1	0.0263158
Gata3+ (0/2)	35	0.921053
Gata3+ (0/2)	2	0.0526316
Sox1+ (0/2)	49	0.753846
Sox1+ (1/2)	16	0.246154
Sox1+ (2/2)	0	0
