# Supplementary material for: Clonally related, Notch-differentiated spinal neurons integrate into distinct circuits
Source: eLife. 2022 Dec 29;11:e83680. doi: 10.7554/eLife.83680 (PMC9799969; doi:10.7554/eLife.83680)
Supplement: Figure 2—source data 1. [file elife-83680-fig2-data1.xlsx]

## Sheet: Fig 2B
Neuron Pair	Sister Neurons distance (GFP-GFP)	Non-Sister Neuron Median Distance (Red-GFP)	90th Percentile Error Bars	10th Percentile Error Bars
1	15.7	217	54	189
2	40.4	85.4	51.7	45.26
3	28	106.5	23	75.76
4	75.6	70.6	99.95	41.1
5	20.2	76.9	51.9	51.73
6	27.2	107	124.25	74.67
7	21.6	70.75	111.9	31.18
8	22.4	113.5	139.6	77.96
9	49.1	133	85.5	56.45
10	23.8	142	104.3	101.3
11	15	75.7	100.15	44.2
12	17.9	107	58.25	71.64
13	26.5	84	72.3	44.83
14	24.5	105	74	77.3
15	19.5	108	86	66
16	26.9	69.8	92	40.66
17	19.6	88.7	100.6	56.32
18	18.3	56.9	106.1	37.5
19	12	50.7	33.4	29.9
20	25.5	85.45	86.2	56.1
21	38.1	110	73.8	61.42
22	25.4	80.6	108	45.18
23	20.4	104.65	84.7	71.82
24	16.2	51.15	57.48	23.84
25	23	74.05	65.9	52.14
26	19.7	63.4	73.8	35.52
27	22.6	57.4	30.62	34.06
28	16	48.25	16.9	32.2
29	21.6	96.1	81.55	73.35
30	14	67.35	49.6	47.12
31	26.5	86.1	57.3	52.56
32	13.4	68.2	98.9	46.2
33	15.8	81.7	80.9	57.82
34	27.4	50.2	47.14	23.68
35	20.4	69.15	85.3	42.74
36	22.3	60.9	36.58	37.06
37	12.2	73.1	109	47.03
38	9.43	39	41.45	20.9
39	17.4	63.05	35.7	29.2
40	10.6	34.55	17.1	19.3
41	18	40.3	27.1	18.1
42	14.2	80.05	80.1	62.86
43	15.2	66.15	64.6	46.8
44	20.3	53	28.38	28.88
45	22.2	60.4	66.7	44.6
46	17.4	54.75	45	25.04
47	14.2	66.8	32.6	34.7
48	21.4	85.45	67.8	53.92
49	16.6	83.6	84.95	53.18
50	18.5	104	65	81.5
51	38.8	51.05	64.2	19.9

## Sheet: Fig 2C
	Individual data														Median
24 hpf Soma Distance	7.32	6.8	7.3	5.32	5.36	6.3	8.3	7.52	7.35	6.2	7.26	5.99	8.65	9.26	7.28
48 hpf Soma Distance Follow Up	8.35	8.33	8.96	7.89	6.8	8.79	10.34	9.82	12.93	7.4	8.34	6.72	10.73	14.34	8.57
	Individual data
2 dpf Soma Distance	7.33	8.63	11.6	8.64	4.72	7.52	9.26	9.39	7.6	5.08	11.3	10.1	12	4.9	6.74	6.91	5.38	12.4	9.28	5.27	6.48	13	7.97	15.1	12	8.68	18	5.59	13.6	10	9.33	8.86	8.79	6.16	6.2	7.87	5.79	9.19	10	9.56	8.77	18	10.8	10.7	11.8	6.9	6.7	4.97	6.51
4 dpf Soma Distance Follow Up	9.16	6.49	14.2	12.2	9.82	7.6	10.9	7.54	7.88	13.8	15.8	11.8	9.01	21.2	13.7	6.12	7.35	12.8	9.25	8.55	13.8	20	13	12.5	15.4	13.7	12.7	5.69	14.3	11	7.29	10.4	13.6	7.77	13.8	15.6	7.18	8.3	10.8	5.38	7.12	16.7	13.8	13.9	15.3	7.42	9.62	11.8	5.68
[truncated: 19 more columns]

## Sheet: Fig 2D
V2a Norm.	V2b Norm.
0.721526	0.764188
0.561152	0.703075
0.526113	0.703054
0.461221	0.785339
0.494716	0.635417		V2a DV Median	V2b DV Median
0.554947	0.628311		0.561152	0.67633
0.56121	0.67633
0.740415	0.639149
0.572145	0.932432
0.797079	0.759372
0.654023	0.766667
0.494118	0.4
0.798403	0.604792
0.527465	0.650728
0.599928	0.748077
0.399941	0.563607
0.690083	0.781596
0.596398	0.71928
0.561501	0.630806
0.455119	0.619322
0.480552	0.707654
0.466631	0.609411
0.586353	0.714286
0.303353	0.432769
0.55482	0.681899
0.57515	0.607831
0.516924	0.632599
