# Supplementary material for: Clonally related, Notch-differentiated spinal neurons integrate into distinct circuits
Source: eLife. 2022 Dec 29;11:e83680. doi: 10.7554/eLife.83680 (PMC9799969; doi:10.7554/eLife.83680)
Supplement: Figure 3—source data 1. [file elife-83680-fig3-data1.xlsx]

## Sheet: Fig 3B
V2a length	V2b length	Spinal Segment
2.222	0.757	13
1.523	0.854	5
1.558	1.501	14
2.177	2.083	2
2.481	1.082	6
1.633	1.331	15
1.927	0.274	21
1.6287	1.018	11
2.034	1.122	14
2.743	1.466	17
2.643	1.793	18
4.641	0.752	9
1.09	0.826	14
2.077	1.389	14
1.796	0.948	15
3.175	1.715	8
2.506	1.393	16
1.803	1.069	5
2.685	0.617	15
0.896	0.725	15
0.456	0.42	8
1.772	1.161	5
0.998	0.704	13
1.263	0.821	15
2.831	0.855	12
0.903	0.56	16
1.069	0.993	12

## Sheet: Fig 3C
Percentage of Axon within 5 um
0.6101
0.4901
0.403
0.0145
0.507864
0.246714
0.397818
0.497523
0.761023
0.080837
0.725435
0.295061
0.327296
0.268541
0.509337
0.000434
0.495283
0.956107
0.73064
0.245154
4.6248e-06
0.336843
0.37838
0.340634
0.371496
0.278184
0.288563
