# Supplementary material for: Clonally related, Notch-differentiated spinal neurons integrate into distinct circuits
Source: eLife. 2022 Dec 29;11:e83680. doi: 10.7554/eLife.83680 (PMC9799969; doi:10.7554/eLife.83680)
Supplement: Figure 4—source data 1. [file elife-83680-fig4-data1.xlsx]

## Sheet: Fig 4F
V2a Detected EPSC Events	V2b Simul. Signal	V2b Detected EPSC Events	V2a Simul. Signal
5.00492	-0.7324	4.1504	1.8311
9.39943	-1.587	5.6153	1.46484
4.76071	0.3662	5.4932	1.95312
8.17872	-1.709	5.249	0.61035
6.836	1.5869	4.2725	0.7324
12.5732	0.3662	10.8643	-0.1221
3.90625	1.2207	5.6153	2.4414
7.20211	1.709	6.7139	-1.58692
7.2022	1.4649	4.6387	0.8545
8.1787	1.831	5.7373	0.73242
4.0284	0	6.4331	-0.72024
10.0097	0.7324	3.85743	1.0254
5.98146	-1.587	7.50732	-0.96435
9.5215	0.9765	4.12041	-0.787908
6.1035	-0.6104	4.41896	-0.12207
5.7373	-0.3662	7.99561	-0.41505
4.7607	-0.1221	8.78906	-0.54931
6.958	-0.2442	25.4516	0
10.1318	0.4883	4.5288	2.9541
19.6533	-0.3662	4.21144	2.11182
7.56832	1.5869	24.7925	0.34181
15.3809	0.6104	3.51564	2.66113
5.3711	-0.1221	4.43117	1.89209
4.5166	-0.2441	4.834	-2.90528
4.39453	-0.9766	4.22363	1.69677
8.42288	0.6103	4.01611	0.708007
6.5918	0.2442	3.75978	0.769054
6.2256	-0.2441	5.47713	1.56472
7.9346	1.0986	4.34569	0.048828
10.6201	1.8311	4.87057	-0.317386
4.27246	0.7324	5.48095	-0.317385
5.6152	1.3428	6.42089	1.06202
4.6387	0.1221	4.04053	0.63478
4.27246	1.5869	4.8706	-1.9043
4.88284	-0.6103	3.88186	1.08642
5.00484	0.7324	3.63771	0.50051
4.02829	-0.3662	4.66308	0.17092
4.88281	-0.3662	3.38133	0.390624
4.63868	2.0752	4.55325	-1.22072
9.03316	-1.2207	13.4766	-0.37843
4.63863	-0.7324	5.2124	-0.89112
11.1083	-0.4883
4.27247	0.7324
4.6386	-0.2441
11.5967	1.2207
4.7607	0.8545
6.10355	0.2441
8.9111	1.09863
11.2305	3.17383
5.127	-0.97656
6.836	-1.34277
5.1269	0.97656
6.7138	-0.36622
7.6904	1.46484
4.6387	1.34277
5.0049	-0.36621
4.5166	0.36622
6.2256	-0.97656
4.2725	-1.09863
5.4931	-0.12207
5.8594	0.24414
5.8594	1.09863
5.4932	1.83106
5.127	-0.12207
4.0283	0.36621
3.7842	1.58691
12.0849	-0.7324
4.27246	-1.709
6.71389	-0.7324
7.81248	-0.4882
5.00486	1.2207
5.37114	1.0986
4.6387	-1.0986
8.1787	0.4883
7.4462	-0.73242
4.6386	0.36621
8.4229	1.46484
4.8828	0.12207
6.2256	1.34277
5.0049	-0.36621
5.85937	0.7324
3.90625	0.122
4.02834	-1.9531
7.44634	0.4883
4.88284	1.5869
11.7188	1.4648
8.0566	-0.4883
4.74855	1.70899
11.4624	-0.01218
10.9985	-0.69581
7.4463	-0.98877
9.72678	-0.975447
2.96631	-0.31741
26.1353	-1.06199
9.61914	1.06201
3.34472	0.47605
7.54948	1.72896
6.27441	-0.43946
7.36084	1.19631
4.04053	1.08641
7.06787	0.72019
3.46679	-1.78219
5.93262	0.72021
4.39452	-1.12303
3.90625	0.07325
4.16259	0.64698
4.90723	0.13429
9.68019	0.15868
12.207	-0.12207
6.46971	0.58592
16.2475	-0.19531
4.05275	0.19533
12.1216	-1.13525
6.8115	1.31837
4.23584	0.866697
5.9082	-0.280761
6.82375	-1.23291
6.10351	1.70899
4.38231	0.341796
9.83888	2.20947
9.86327	-0.134278
7.60498	-0.146484
5.02929	1.4038
9.37499	1.20849
3.95509	0.402831
9.04542	-0.24414
3.89404	-0.45167
4.78516	0.40281
13.0127	1.18407
9.0454	0.40286
5.84718	-1.48926
5.45656	0.21972
9.22852	0.24416
4.50439	2.86866
4.41895	-0.62254
6.43311	-0.65918
6.83591	1.06201
8.44726	0.439452
3.72313	2.06299
4.44337	-0.03662
3.4668	0.451659
6.79931	0.415042
5.0171	1.61131
4.01612	-0.78127
5.1758	-0.9033
7.80031	-0.41504
3.6288	-0.3539
4.27245	-1.31833
3.69873	-1.73342
5.24901	-1.98976
18.5425	-0.646975
3.93065	4.04053
8.45947	1.62353
3.52784	-1.09863
7.51952	-1.48926
5.44325	-0.524901
11.8191	-0.363497
5.41993	-0.109862
4.00392	-0.292968
5.68847	1.46484
7.78946	0.587292
3.78418	-0.231935
4.83396	-1.23291
7.34863	3.08838
4.95605	2.25275
3.95508	1.59911
6.67723	-0.43943
8.67919	0.58593
5.13918	0.64696
4.8462	-2.02229
5.05371	0.838211
4.35789	0.64697
3.36914	-0.48827
4.22363	1.75782
7.86131	-0.30519
3.9727	0.410979
6.17677	-0.07324
4.79736	2.67334
5.78615	-0.964353
6.03029	-1.23291
3.98628	-0.842289
4.61427	-0.610353
4.05277	-0.451667
6.21338	-0.964353
6.67726	0.012208
3.8669	1.02946
5.44434	0.036624
4.34571	-1.11084
4.40673	-0.13426
8.667	-0.89108
4.38233	-0.01222
7.25097	-1.355
5.04149	0.32958
4.94387	0.854505
5.26121	-1.51367
4.02832	0.76903
5.7129	0.92771
6.28664	-0.74463
3.91846	1.17187
7.43408	0.708
3.85744	-1.3306
10.7666	-0.01223
6.81151	-0.26852
4.32128	-0.43949
4.95604	-1.07419
5.15135	-0.86669
4.5288	-0.90332
6.72607	-0.52489
9.13085	1.96532
6.93358	0.79346
9.11864	-1.17186
3.66211	0.708
21.5576	2.29493
9.03319	1.42824
5.78614	0.12207
7.44627	0.42726
7.31201	2.4414
5.54202	1.5625
10.5469	0.48829
6.04245	1.67238
6.22558	-0.31739
5.85938	1.6968
13.6597	-0.561522
7.34863	-0.659178
12.5122	-0.329589
5.51758	-0.012207
16.5893	0.598143
11.6577	0.256351
4.49218	-0.146487
6.56739	-1.08642
4.1626	-0.610359
3.80858	-0.012206
5.11474	0.96436
5.70068	-0.170898
13.7695	-0.231933
3.1006	2.01416
3.86962	3.00293
7.08009	1.61133
10.73	15.3442
3.89404	-0.878904
7.20213	-2.69776
6.39648	0.48828
4.74855	0.524901
4.24806	1.58692
8.11766	1.02539
3.35694	0.34178
3.54004	-2.28272
11.8286	0.13429
10.376	-0.24413
14.7339	0.63476
9.32616	0.67141
9.14305	1.52587
4.80957	0.47605
8.36181	-1.62352
16.1865	0.08545
7.39745	0.109863
9.05761	-0.585936
4.1626	-0.085449
4.5166	0.781248
8.43506	1.62354
3.85743	2.16065
6.4087	-1.30615
19.6533	1.77001
5.88378	18.0298
7.17772	-1.52588
3.88182	0.720216
4.26025	1.17188
4.47999	1.66015
5.46874	1.89209
8.58157	2.17285
4.99268	0.427248
6.9214	-0.964363
4.46776	0.195312
9.43602	0.695799
4.06494	-0.549315
4.19921	-0.85449
4.73634	0.524908
9.0332	-1.48927
14.3799	0.56153
9.96095	-0.12206
5.23681	-0.26855
15.7227	-0.5127
4.01609	1.48926
9.74121	0
12.5122	-1.83104
9.82666	-0.01221
21.2769	-0.79347
4.22363	2.46581
12.5	0.31739
14.4775	-0.03663
4.02831	-1.24513
9.9243	0.91553
7.39745	0.21973
4.69969	-0.67138
12.5244	-0.43946
4.39453	-0.29297
4.80957	-0.42727
5.54199	0.32959
10.6445	0.28075
7.17776	0.01221
6.43311	-0.12206
7.54396	-0.15869
9.58253	-0.79347
5.60305	-0.13427
11.1694	1.04984
15.0513	0.69579
6.86036	0.73246
4.85838	0.74462
5.09034	0.65917
8.15428	-0.08544
5.48098	-1.01316
4.21145	0.20754
4.05273	0.30518
8.3374	-0.29298
4.89502	0.6836
4.58983	0.5615
4.46778	-1.18408
5.28564	0.81788
3.91846	0.6714
6.8115	1.34277
3.50341	0.34183
15.625	2.67334
8.41065	0.317382
4.76076	-0.48828
6.83596	-0.073242
7.94676	-1.24512
3.4546	1.36718
7.89794	-0.83008
4.33349	1.23294
7.81251	-0.888397
14.0869	1.26954
4.26027	-0.5127
4.12599	-1.96534
5.3833	-0.31738
4.98267	-0.585683
10.0952	-0.96436
6.73015	0.371617
6.35984	1.52589
4.8828	1.11085
6.97291	0.48149
4.73633	-1.59909
8.12718	-0.237356
4.38502	0.420466
8.27637	0.80567
3.40577	-2.35595
4.17617	1.31159
7.18452	-0.949427
11.9784	0.375093
7.01902	-0.52489
4.89502	-0.61036
7.95897	-0.14646
3.45731	0.440833
4.68751	1.17188
13.147	-1.64794
9.09536	-0.54819
4.98589	0.236023
4.00391	0.23193
5.78615	0.20753
3.84522	-0.0122
5.66406	1.79442
4.63868	-0.54935
4.01612	-0.25635
4.78517	1.76999
6.7982	0.582611
5.21239	0.08545
7.84912	0.00134667
4.41896	-0.02444
4.79736	0.23192
3.95506	-0.6958
8.17872	0.42722
6.91596	0.961654
6.94026	1.31948
9.37498	-1.55029
3.89182	-0.331805
4.4023	-0.45165
5.04152	-1.26952
11.145	0.20751
7.15333	-0.31738
4.12044	0.375079
10.0586	0.68359
8.46392	0.62701
8.49609	0.7202
9.10642	0.19534
6.11574	1.86766
5.79836	-1e-05
6.21338	-0.6958
4.22363	0.97655
10.3272	0.70803
7.47071	1.00098
4.25025	0.397283
20.7519	0.610367
13.1103	-0.732437
4.77296	-1.00097
3.75976	-0.561523
6.23778	0.183113
5.21239	1.7212
3.25928	-1.29394
14.2456	0.415038
7.25098	-0.268554
3.74756	0.122069
8.91113	-0.830077
10.8032	0
4.15037	0.903318
8.63037	-0.512694
5.01708	0.390624
7.21433	2.4292
6.66503	-0.14647
9.61915	-0.48828
5.65186	1.11085
4.06494	1.51367
4.34571	0.17091
8.06886	1.22071
7.08009	-1.08642
12.085	1.01318
4.46778	0.854491
3.8452	-0.073242
4.61427	0.683592
17.3584	0.97656
6.55518	-0.354003
6.86037	-1.29394
5.01708	0.683592
5.71289	-0.12207
3.62547	-0.268555
3.72317	-0.500492
13.7329	1.98974
3.83299	3.07617
7.7637	2.51465
12.4756	-1.8921
4.71193	0.75684
8.60595	-1.4038
4.02833	-0.964358
5.55418	-0.427245
3.69872	-0.61035
4.07713	0.6836
12.5	-1.31836
4.17482	1.20854
7.04345	-0.31738
5.27347	-0.76901
10.3638	0.34181
5.16357	-0.1831
4.07712	0.61036
5.31005	0.07325
14.1357	0.122078
6.18896	-1.48925
6.15233	0.097656
4.95605	-0.292968
6.56739	0.549316
12.1582	-1.44043
3.9429	2.67334
4.24806	0.415038
4.24806	0.415038
7.12892	-0.939939
5.2368	3.479
7.22655	-0.585936
4.45556	0.354006
3.83301	0.134277
5.49318	-2.05079
4.05271	0.158691
4.99268	1.01318
4.35791	0.646971
15.4663	-0.50048
7.93457	0.19532
7.88574	-1.63574
4.35789	0.0122
7.91014	-0.03661
7.45848	-1.11082
4.38232	-1.0376
11.5967	-2.09961
6.39646	1.35498
6.62841	0.98878
13.6108	0.58594
8.77684	0.08544
4.58984	1.50148
4.83399	0.24414
7.91015	-1.14746
5.18799	-0.07326
10.1197	2.91748
7.48291	-0.061035
6.75049	1.7334
3.85741	-0.354003
4.07715	-0.292968
6.90916	2.4292
8.53274	0.329589
3.7964	-0.476076
3.36912	-0.512699
7.43407	0.24414
6.77489	2.13623
7.18995	-0.134277
5.61522	1.13525
8.56932	0.219728
3.99171	0.488275
5.22461	0.0122
6.00587	0.26854
17.7856	0.0366
6.18898	-0.28076
15.4541	1.14746
8.21533	-0.69579
3.90626	1.12305
4.98049	-0.92776
6.20116	-0.23194
4.71192	0.31738
4.11375	0.964358
4.49221	0.537109
4.05273	1.79443
10.6445	2.69775
5.35889	-1.20849
6.87257	0.89112
5.61523	0.671385
5.29784	1.42823
5.60303	2.13623
4.43114	-0.195312
5.39549	0.891111
6.01808	-1.86767
9.15528	2.417
3.63771	-1.15966
4.40674	-1.01318
4.90724	-0.634772
4.63866	0.402831
3.61327	-0.12207
4.44334	1.04981
5.62743	1.31836
4.98049	0.26853
6.2378	3.44237
3.418	0.15868
3.64991	0.561522
5.0171	1.59913
6.2622	-0.878906
3.86963	-0.195312
5.45655	0.08548
3.94286	-0.59817
6.07906	-0.732429
3.88185	0.13428
4.83398	0.1709
7.69045	0.817873
10.3149	2.53906
3.63769	1.48925
5.0781	0.207519
6.44531	-0.476073
4.50441	-0.439456
10.8643	0.439451
4.71191	0.134278
8.61816	-0.24414
4.08934	-2.06299
6.38428	1.53808
3.9795	0.268554
3.58887	-1.78223
5.59082	-0.988777
6.48193	1.5137
6.05468	-0.07327
3.66212	0.41504
4.47999	1.19629
4.23584	1.04978
4.1626	-1.97755
3.95506	-1.04981
3.90624	0.67139
6.60402	-0.91551
5.05372	1.11084
3.40575	0.07325
5.56641	-0.13429
4.32129	0.256347
4.10156	-1.35498
3.71095	1.77001
3.96727	0.073242
5.3589	1.45263
5.29787	1.47706
15.3687	-0.109863
7.20214	-1.36718
10.2417	0.622557
6.16457	-0.329589
13.7329	-0.585936
4.88279	0.292968
7.01903	-0.07324
11.1694	0.756834
6.97021	0.842287
3.68653	3.22265
4.77295	1.26953
5.87158	-0.15871
4.6753	1.11085
4.33349	-0.41503
4.79736	0.07324
4.39454	-0.89114
6.35986	-1.00095
6.49415	-0.30515
4.94386	-0.70801
8.36181	2.28275
9.50927	0.634757
10.1074	-0.048828
5.95705	0.109863
4.38229	0.659182
6.98245	0.781254
8.8501	1.40381
3.61329	-1.01318
9.25291	1.06201
4.63869	1.00097
4.76078	0.085449
6.53077	1.14746
6.78711	-1.25732
9.80228	0.085449
3.33249	-0.146484
3.49121	0.341798
4.66308	-1.98975
9.15528	1.12305
3.33252	1.70898
5.38331	0.024415
5.94482	0.561522
7.04346	-0.671391
5.84716	-0.366214
4.35793	0.36621
4.73632	0.231936
7.14112	0.73242
3.39355	0.96434
3.69873	-1.46483
4.23585	0.15869
5.90819	-0.69581
3.88187	1.42822
4.05275	0.58592
7.11669	0.8667
12.8296	-0.04882
5.11475	-2.4536
4.21143	-0.65919
3.74755	1.44044
5.21242	1.00097
11.1572	1.70898
5.60302	-0.24414
4.50441	1.23291
4.01609	0.817869
3.67433	0.024414
4.16259	-1.48926
3.41796	-1.25732
5.29784	0.659178
3.02737	-1.17187
7.51952	1.18408
4.13819	0.585936
3.75976	0.952154
5.81058	0.402831
3.58886	-1.19627

## Sheet: Fig 4G
V2a Median	V2b Corresponding Median	V2b Median	V2a Corresponding Median
6.03026	0.225821	4.76075	0.2441
5.24904	0.48828	4.76074	-0.10989
4.95609	0.97656	5.24898	0.97656
5.6153	0.122	6.1035	0.4883
5.8594	0.13427	4.02222	1.20849
4.69972	1.60114	5.02929	0.36621
6.0852	0.29296	4.7607	4.63862
8.02004	0.109863	4.60205	0.10987
5.14798	-0.179222	5.24903	0.0876582
4.52881	0.06105	6.51858	0.0709991
5.60304	0.164796	4.834	0.50051
6.22555	0.12205	8.17872	0.996867
6.16455	2.5e-05	8.97215	0.18305

## Sheet: Fig 4H
V2a_Median EPSC	V2b_Simul. Median EPSC	V2b_Median EPSC	V2a_Simul. Median EPSC
14.3738	-0.0061035	4.58984	0.152588
7.28757	-0.0671379	4.45557	0.329589
5.12697	0.231936	5.26124	0.2442
5.27548	0.01221	5.06592	0.268554
6.90308	0.36621	5.49316	2.4414
5.0049	0.146484	4.56543	0.097656
4.6631	0.12207	0	0
5.0049	0	5.00488	-0.122065
5.62745	0.024414	6.01029	-0.1343
5.49315	0.3662	4.7608	0.1831
9.92432	-0.14648	4.65698	-0.0305175
6.63656	-0.048828	4.85118	0.0987805
5.4932	0.018312	5.39551	0.2441
