# Supplementary material for: Clonally related, Notch-differentiated spinal neurons integrate into distinct circuits
Source: eLife. 2022 Dec 29;11:e83680. doi: 10.7554/eLife.83680 (PMC9799969; doi:10.7554/eLife.83680)
Supplement: Figure 6—source data 1. [file elife-83680-fig6-data1.xlsx]

## Sheet: Fig 6E
Time of First Spike ms
1.2
1.2
1.68
0.24
3.1
0.8
1
0.8
0.2
0.4
2
0.48
0.56
0.6
0.6
0.5
0.8
0.4
0.7
4.38
7.6
4.18
6.34
6
5.8
5.1
5.2
5.3
5.3
6.64
9.62
9.66
9.7
9.6
9.6
9.6
9.5
9.2
1.94
3.12
3.48
3.4
3.5
8.7
2.98
4.76
5.18
5
5.2
5.2
5.4
6.3
5.6
5.1
5.88
14.48
14.96
18.34
14.4
18.3
19
20.8
21.6
