# Supplementary material for: Clonally related, Notch-differentiated spinal neurons integrate into distinct circuits
Source: eLife. 2022 Dec 29;11:e83680. doi: 10.7554/eLife.83680 (PMC9799969; doi:10.7554/eLife.83680)
Supplement: Figure 7—source data 1. [file elife-83680-fig7-data1.xlsx]

## Sheet: Fig 7E
Evoked EPSC	7.09636	0	0	9.51472	8.34146	0	0	15.647	16.371	8.07513	8.07513	0	0	8.2218
Evoked IPSC	32.2266	12.6166	17.1799	0	40.8383	6.72886	13.0608	0	0	0	0	10.5274	8.89806	0

## Sheet: Fig 7F
None	Slow	EPSC Only	IPSC Only	Both
75	10	6	6	2

## Sheet: Fig 7G
Slow EPSC Avg	Slow Rise Time Avg	Fast EPSC Avg	Fast Rise Time Avg
3.86556	1.86943	7.09636	0.3
4.30205	1.52836	9.51472	0.387667
4.6285	2.287	8.34146	0.4041
4.00798	1.997	15.647	0.2169
3.6954	3.12536	16.371	0.2195
3.47494	2.4936	8.07513	0.3106
3.6902	1.9065	8.07513	0.3458
4.1006	2.195	8.2218	0.3739
4.32	2.451
6.106	1.517
